# Supplementary material
Source: publisher figshare collection journal article supplement (https://frontiersin.figshare.com/ndownloader/files/34766986)
Supplement: Supplementary file [file 34766986]

## Internal validation set

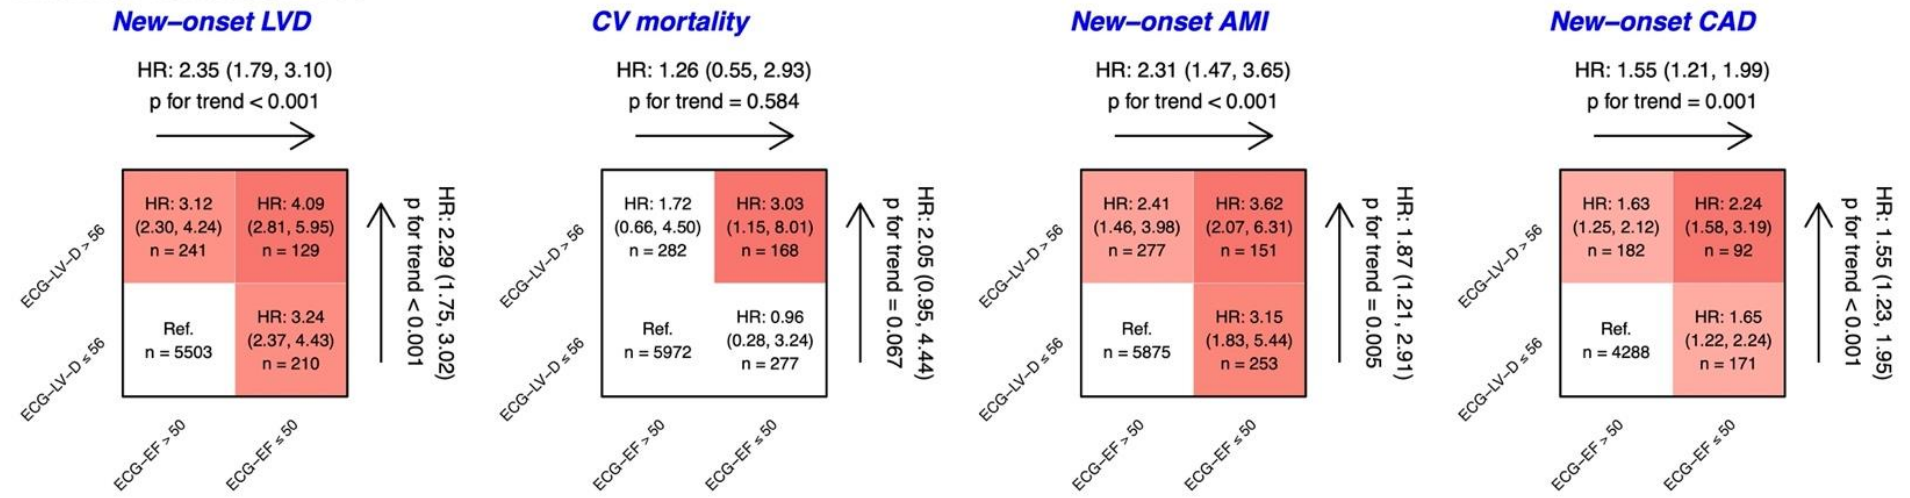

## External validation set

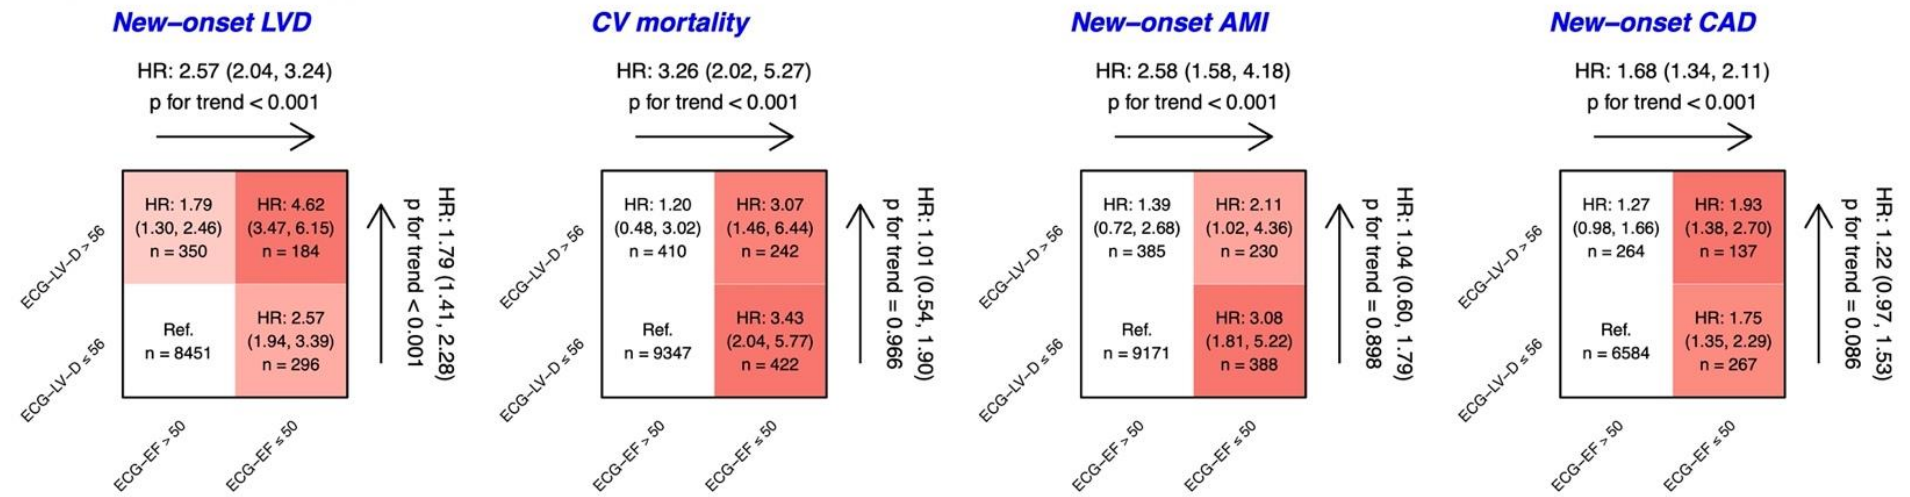

**Supplementary Figure 1** | Risk matrixes of different predicted ejection fraction (ECG-EF) and left ventricle (end-diastole) (ECG-LV-D) groups on adverse events in patients with an initially normal EF (EF >50%). The hazard ratios (HRs) are based on Cox proportional hazard model adjusting by gender, age, and comorbidities. The color gradient represents the risk of corresponding group, and the non-significant results are defined as white.
